# Supplementary material for: Tunable electronic and dielectric properties of β-phosphorene nanoflakes for optoelectronic applications
Source: Royal Society of Chemistry journal article supplement (doi:10.1039/c6ra16534f), 2016-01-01
Supplement: c6ra16534f1.pdf [file c6ra16534f1.pdf]

## Supplementary Information

### Tunable Electronic and Dielectric Properties of $\beta$ -Phosphorene Nanoflakes for Optoelectronic Applications

Pradeep Bhatia\*, Ram Swaroop and Ashok Kumar\*

*Center for Physical sciences, School of Basic and Applied Sciences, Central  
University of Punjab, Bathinda-151001, India*

(Oct. 5, 2016)

\*Email:

Pradeep Bhatia ([pardeepbhatiahp@gmail.com](mailto:pardeepbhatiahp@gmail.com))

Ashok Kumar ([ashok@cup.ac.in](mailto:ashok@cup.ac.in))

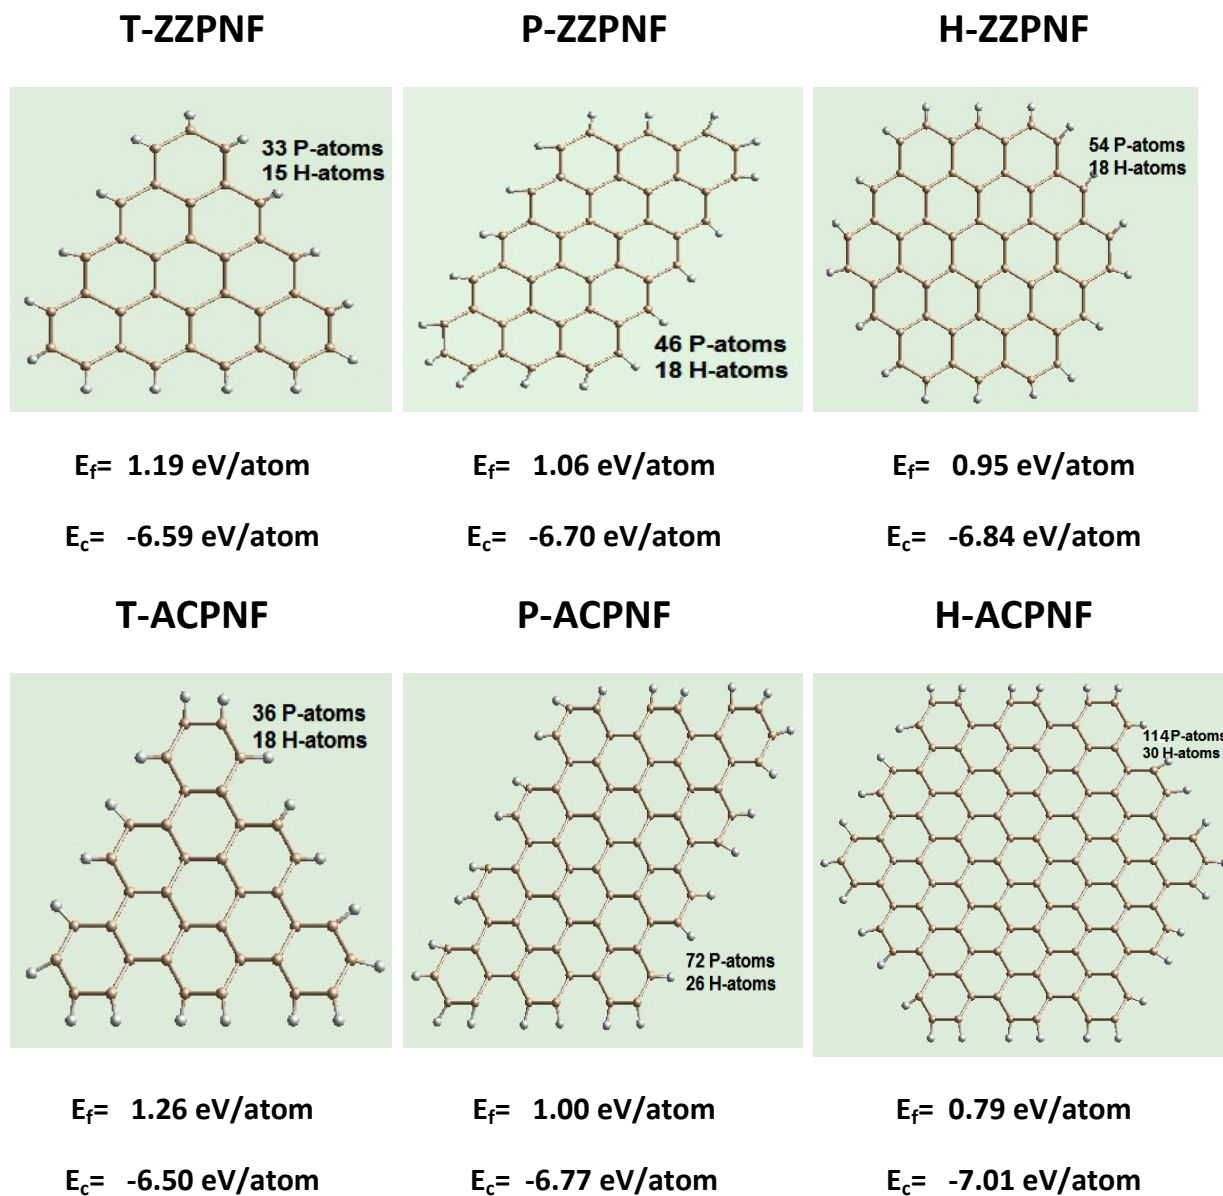

**Figure S1:** Various  $\beta$ -phosphorene hydrogen passivated nanoflakes with zigzag (ZZ) and armchair (AC) edge structures with triangular (T), parallelogram (P) and hexagonal (H) shapes. The formation energy ( $E_f$ ) and cohesive energy ( $E_c$ ) are also shown with each hydrogen passivated nanoflakes.

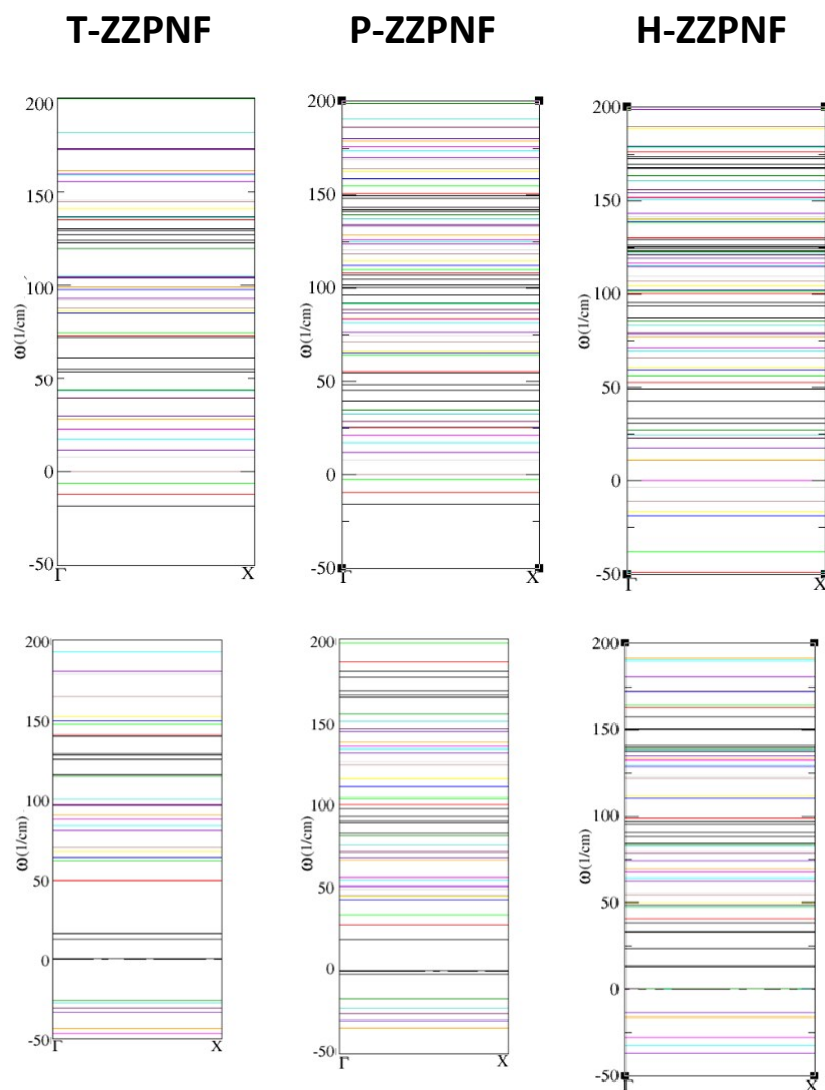

**Figure S2:** Phonon spectra of zigzag (ZZ) edge  $\beta$ -phosphorene nanoflakes with triangular (T), parallelogram (P) and hexagonal (H) shapes. Upper panel has bare ZZPNFs while lower panel has corresponding hydrogen passivated nanoflakes.

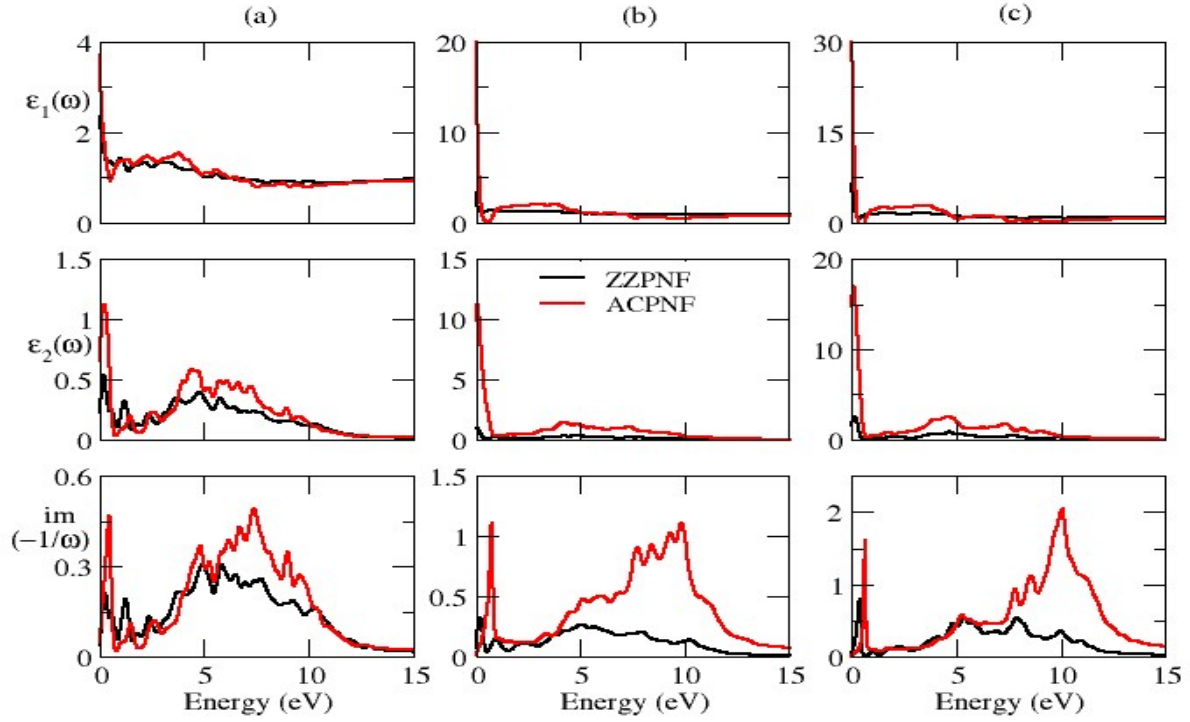

**Figure S3:** Real part of dielectric constant ( $\epsilon_1$ ), imaginary part of dielectric constant ( $\epsilon_2$ ), electron energy loss spectra of unpassivated ZZPNF and ACPNF with (a) triangular (T) (b) parallelogram (P) and (c) hexagonal (H) shape, for in-plan polarization.

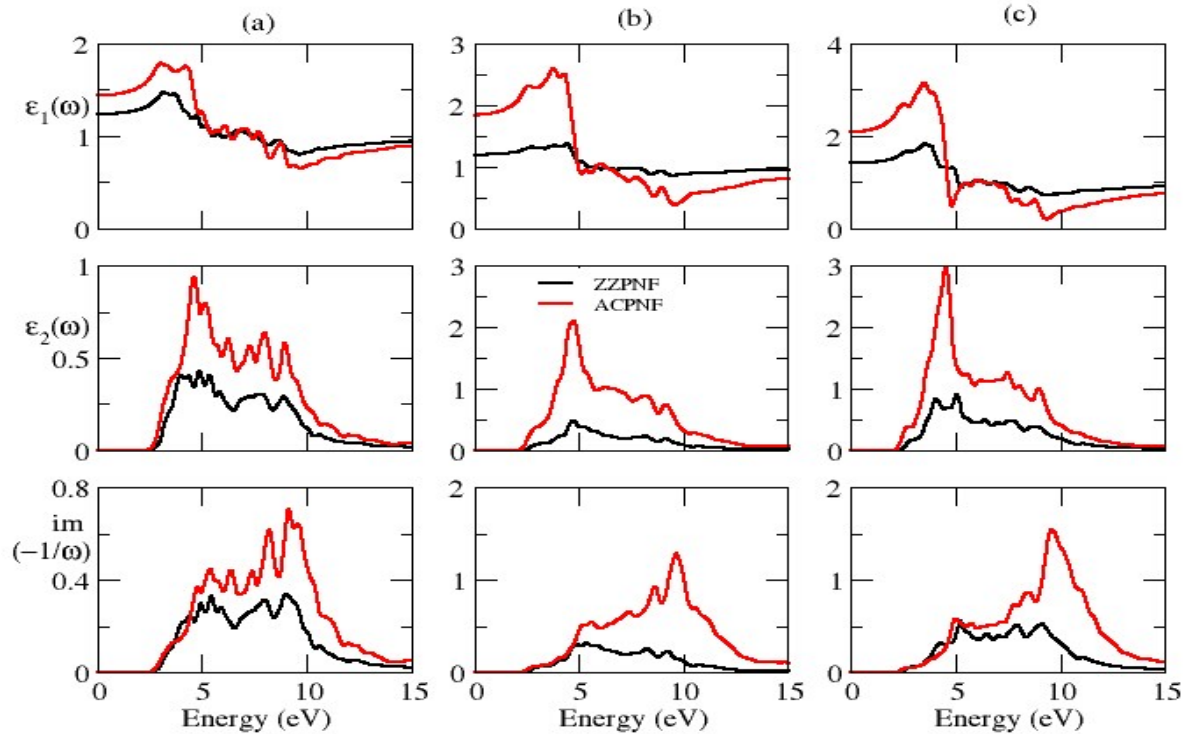

**Figure S4:** Real part of dielectric constant ( $\epsilon_1$ ), imaginary part of dielectric constant ( $\epsilon_2$ ), electron energy loss spectra of hydrogen passivated ZZPNF and ACPNF with (a) triangular (T) (b) parallelogram (P) and (c) hexagonal (H) shape, for in-plan polarization.

## ZZPNF

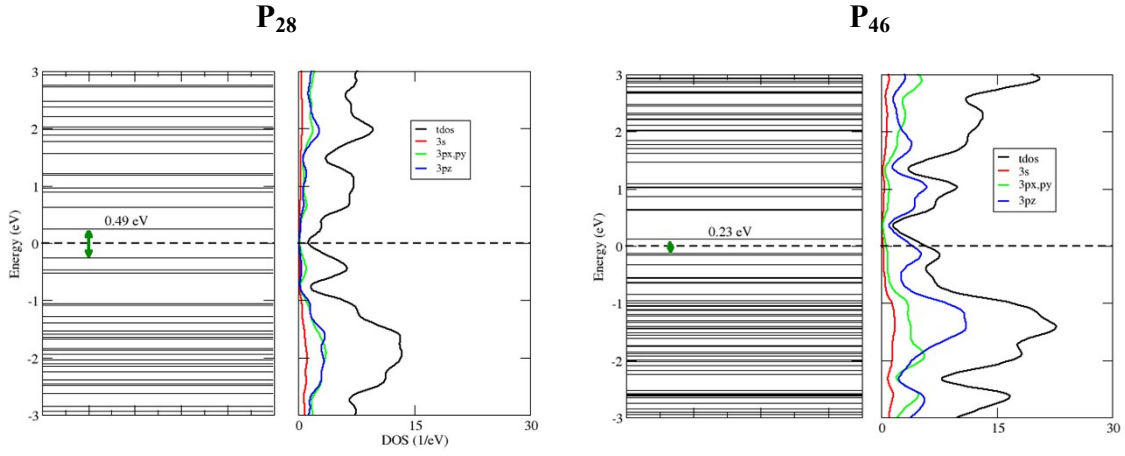

## ACPNF

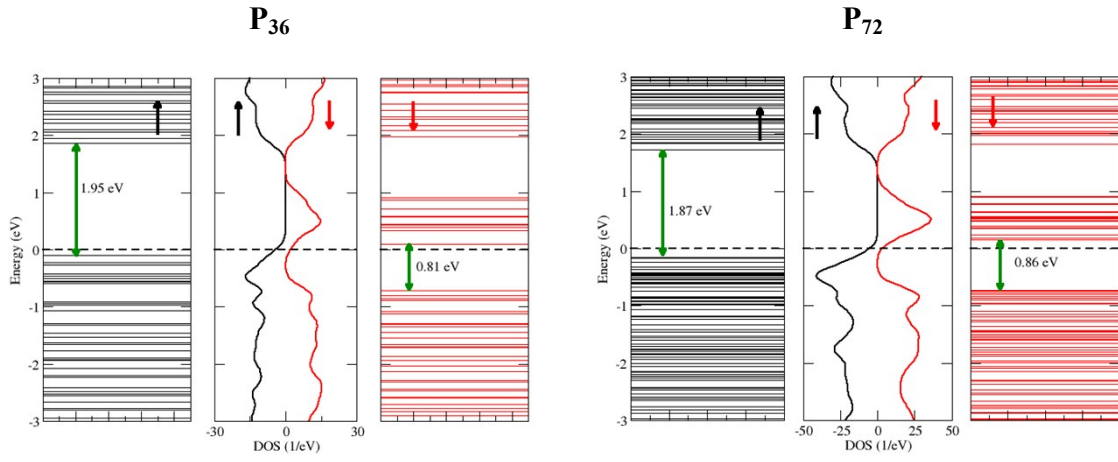

## H-ZZPNF

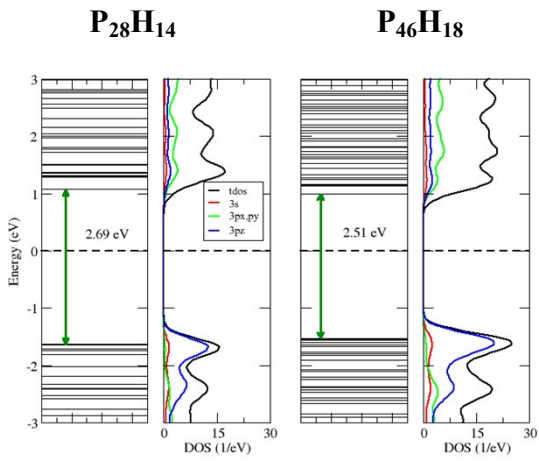

## H-ACPNF

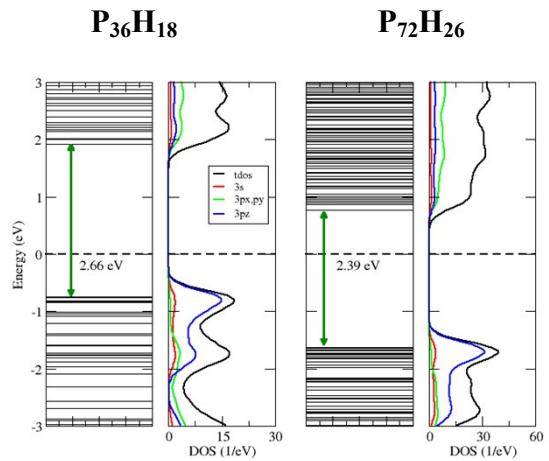

**Figure S5:** Parallelogram (P)-shaped zigzag (ZZ) and armchair (AC) nanoflakes with different number of P-atoms in bare and hydrogen-passivated PNFs.
